# Supplementary material for: A rhodamine based biocompatible chemosensor for Al3+, Cr3+ and Fe3+ ions: extraordinary fluorescence enhancement and a precursor for future chemosensors
Source: Royal Society of Chemistry journal article supplement (doi:10.1039/c9dt03833g), 2019-01-01
Supplement: c9dt03833g1.pdf [file c9dt03833g1.pdf]

**Rhodamine based biocompatible chemosensor for Al<sup>3+</sup>, Cr<sup>3+</sup> and Fe<sup>3+</sup> ions:  
extraordinary fluorescence enhancement and precursor for future  
chemosensors**

**Ankita Roy,<sup>a</sup> Soumi Das,<sup>a</sup> Sukriti Sacher,<sup>b</sup> Sushil Kumar Mandal<sup>c</sup> and Partha Roy<sup>\*a</sup>**

<sup>a</sup> Department of Chemistry, Jadavpur University, Jadavpur, Kolkata 700032, India

E-mail: partha.roy@jadavpuruniversity.in; proy@chemistry.jdvu.ac.in

<sup>b</sup> Special Centre for Molecular Medicine, Jawaharlal Nehru University, New Delhi 110067, India

<sup>c</sup> Department of Ecological Studies and International Centre for Ecological Engineering (ICEE),  
University of Kalyani, Kalyani, Nadia 741235 West Bengal, India

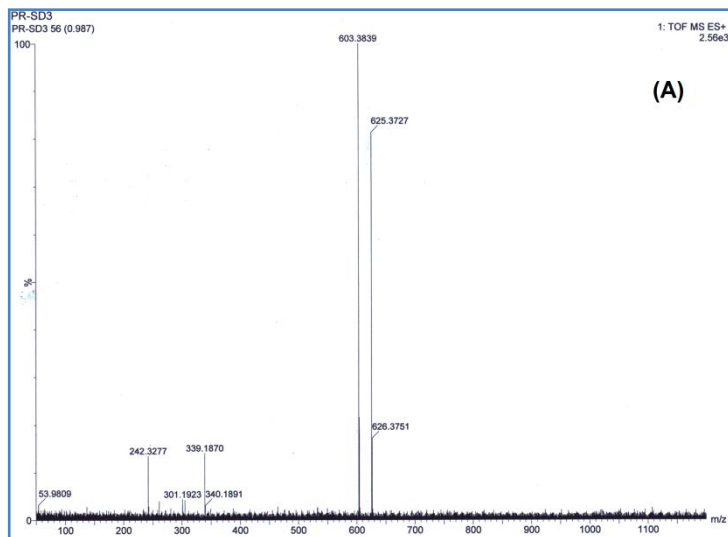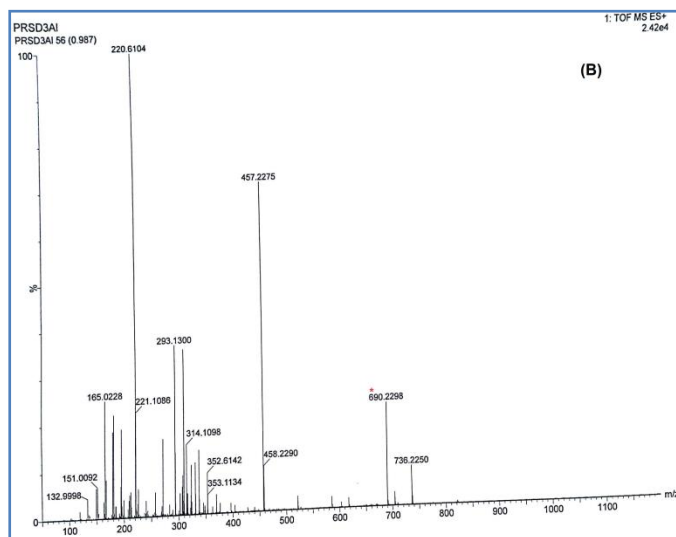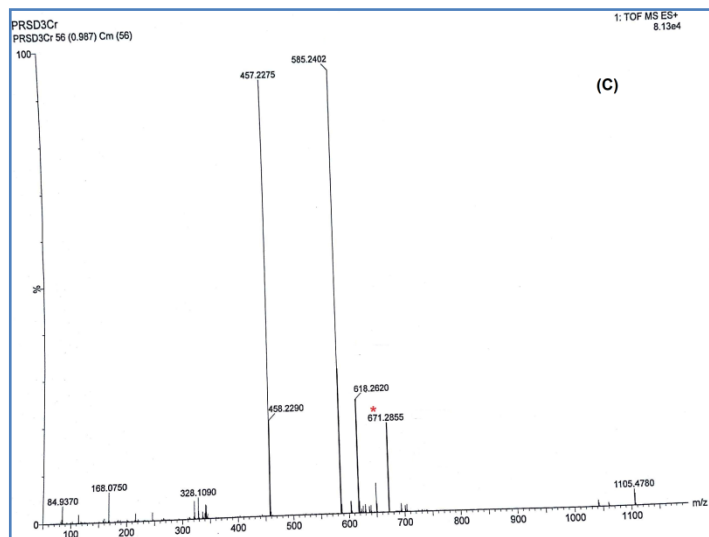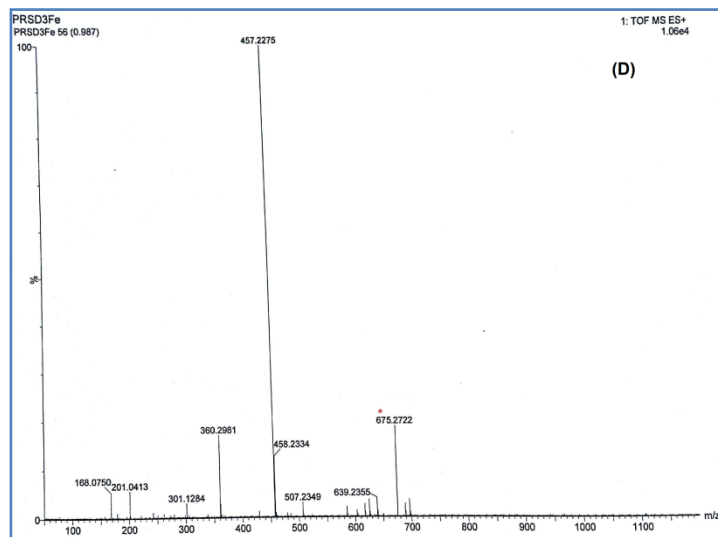

**Fig. S1** ESI mass spectrum of (A) HL-CHO, (B) Al<sup>3+</sup> complex of HL-CHO, (C) Cr<sup>3+</sup> complex of HL-CHO and (D) Fe<sup>3+</sup> complex of HL-CHO.

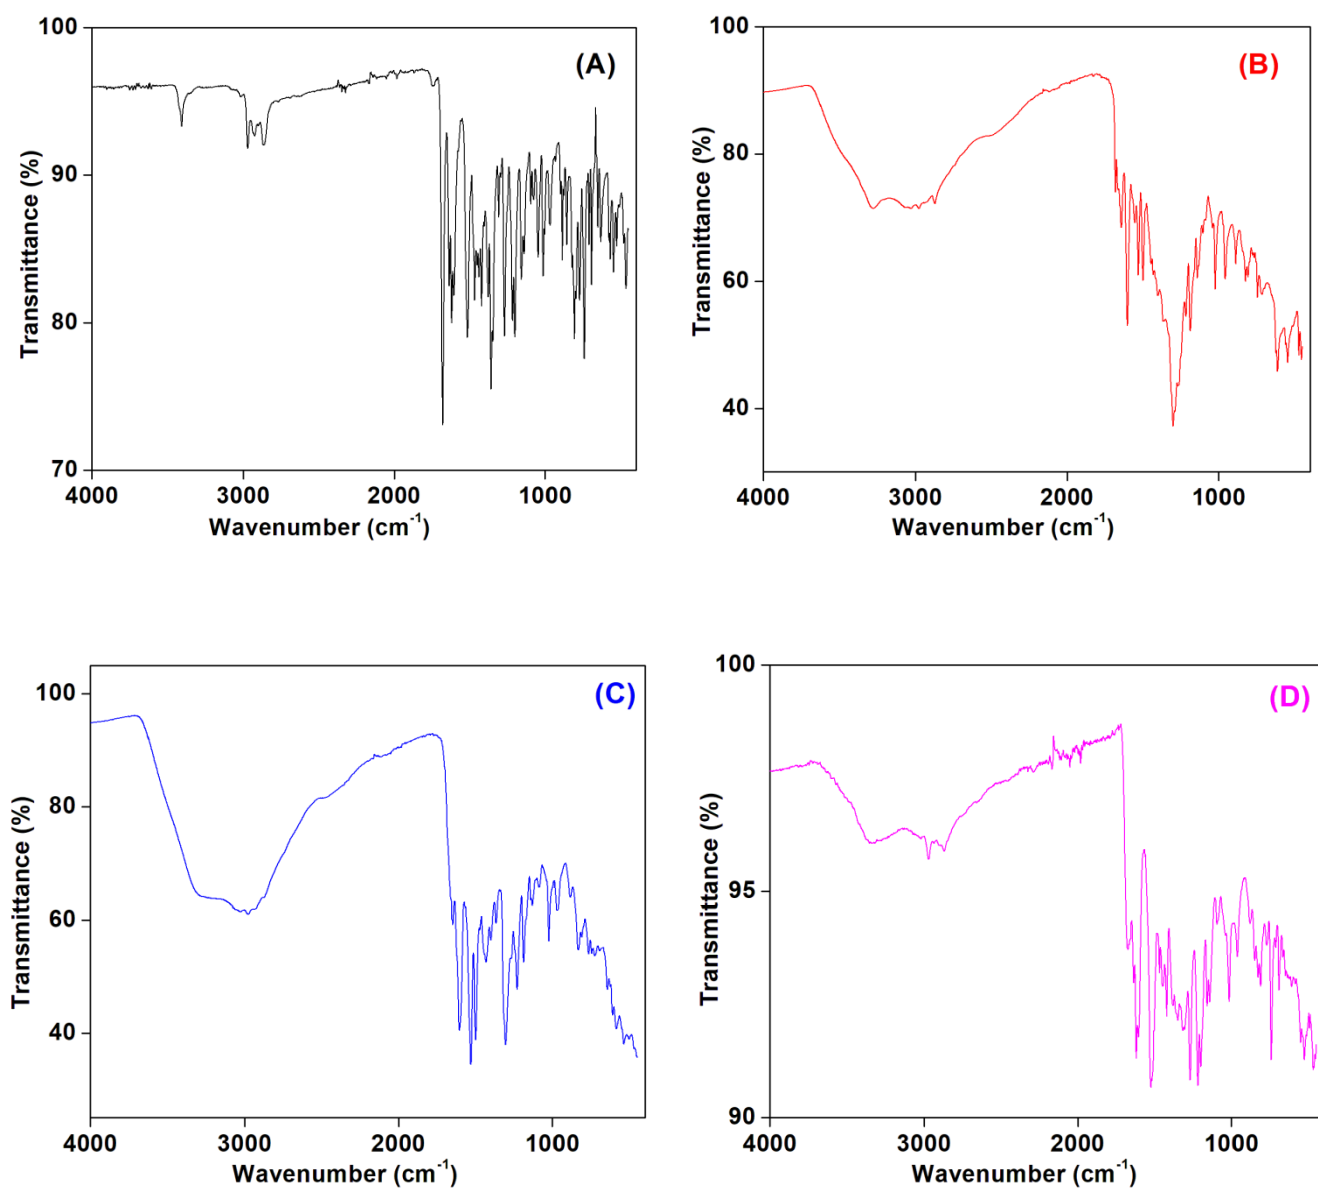

**Fig. s2** FT-IR spectrum of (A) HL-CHO, (B) Al<sup>3+</sup> complex of HL-CHO, (C) Cr<sup>3+</sup> complex of HL-CHO and (D) Fe<sup>3+</sup> complex of HL-CHO.

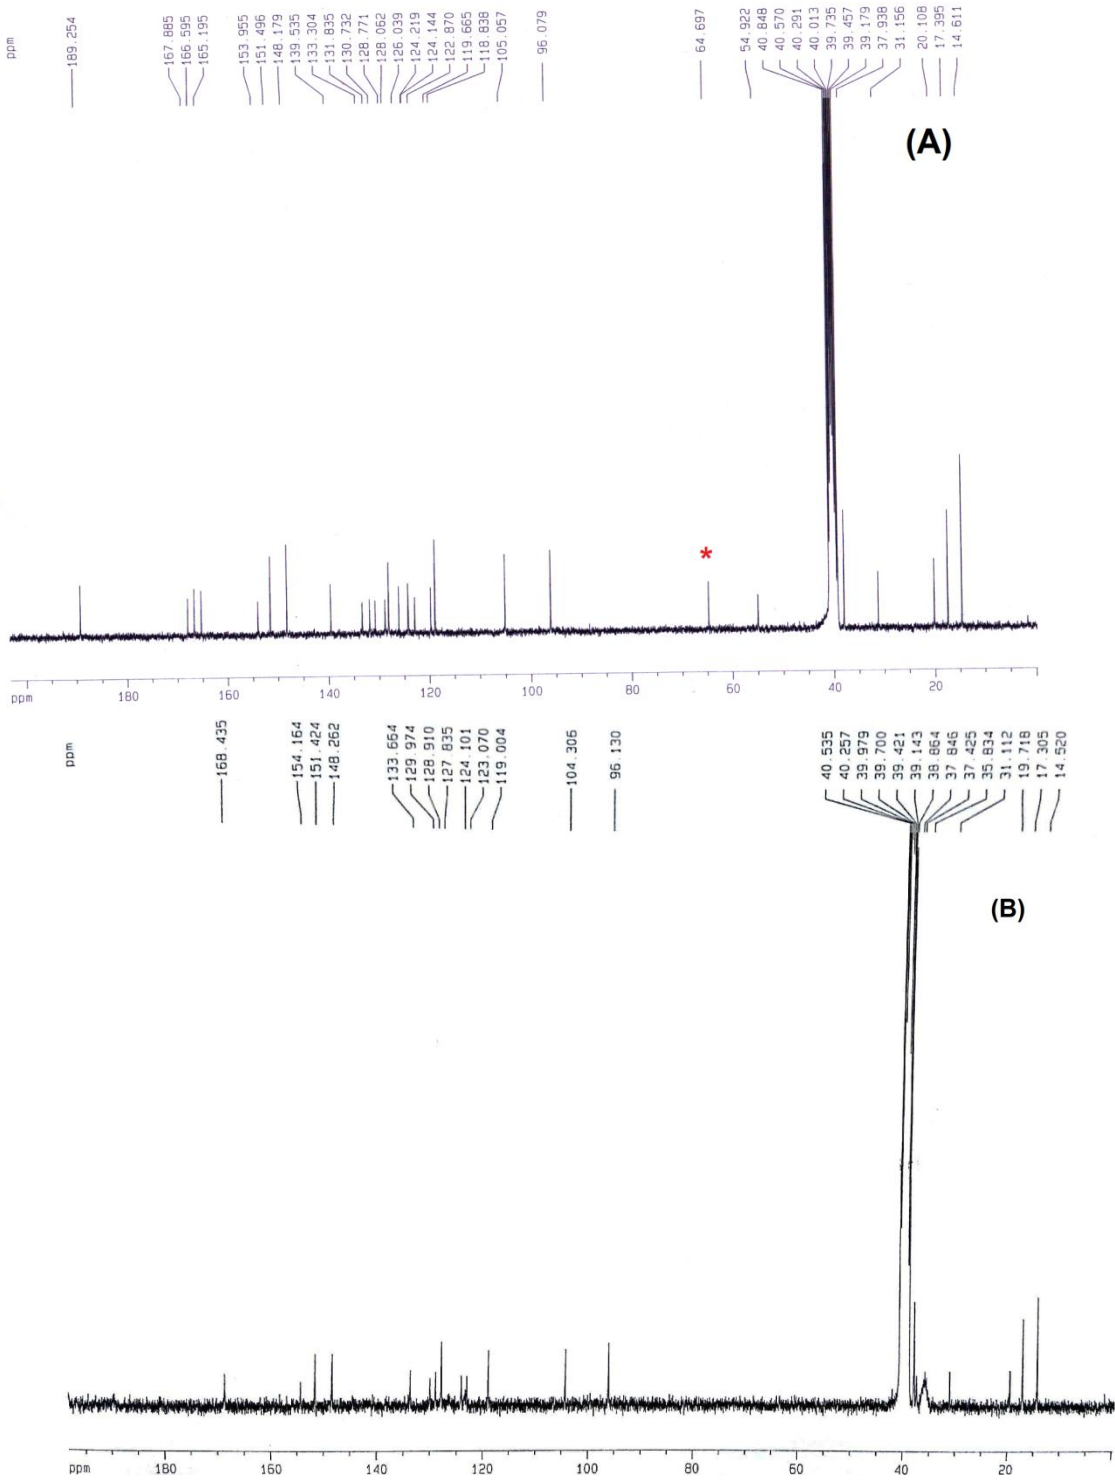

**Fig. s3**  $^{13}\text{C}$  NMR spectrum of (A) HL-CHO in  $\text{DMSO-d}_6$  and (B) HL-CHO in the presence of  $\text{Al}^{3+}$  ion in  $\text{DMSO-d}_6$ .

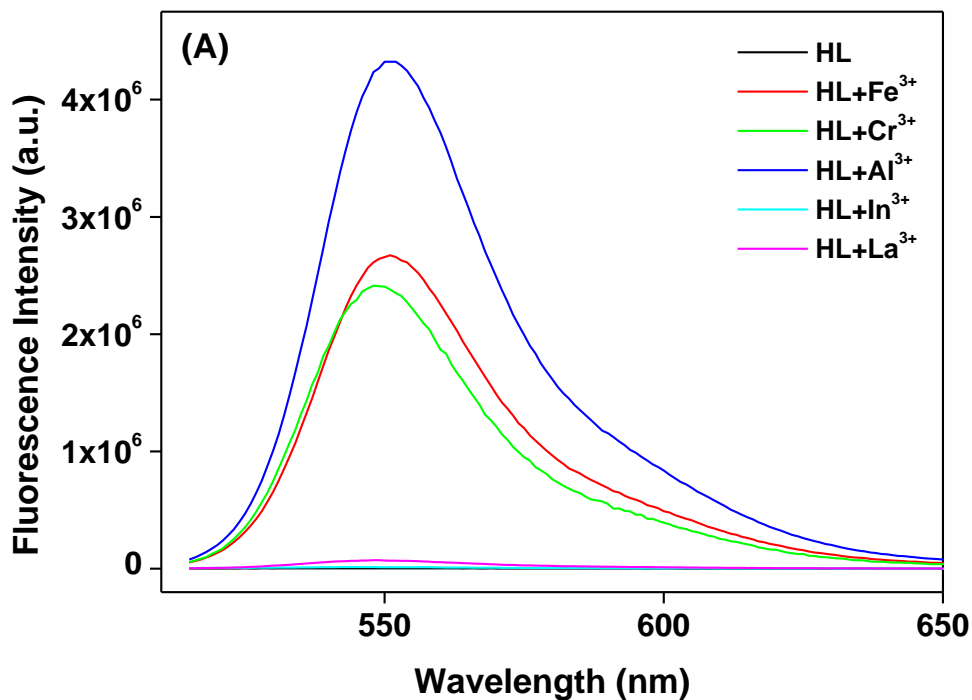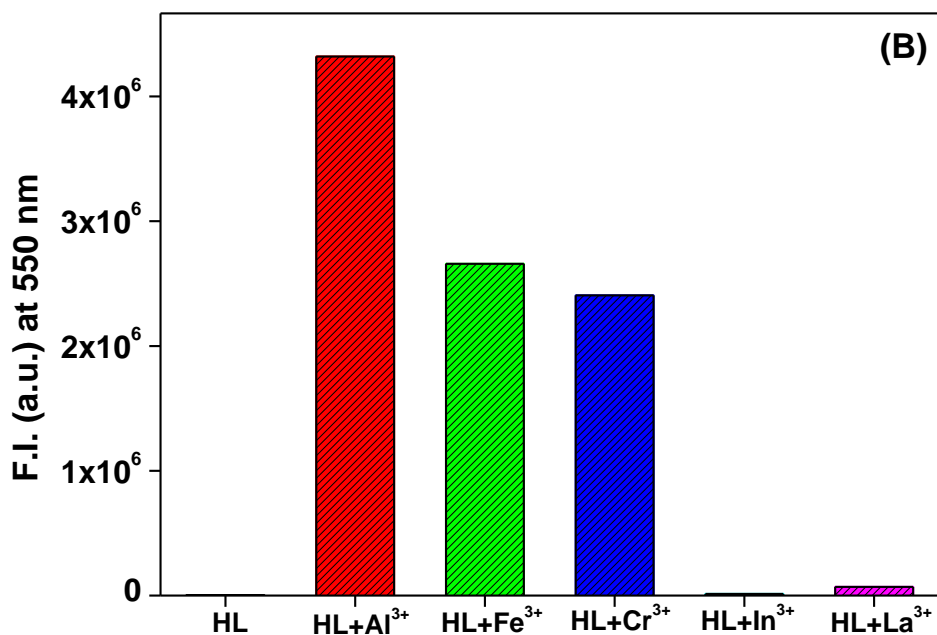

**Fig. s4** (A) Fluorescence intensity of HL-CHO (40 μM) at 550 nm in the presence of one equivalent of different trivalent metal ions in 10 mM HEPES buffer in water:methanol (1:9) (pH 7.4) at room temperature; (B) Same result represented as bar diagram. Here, HL denotes HL-CHO.

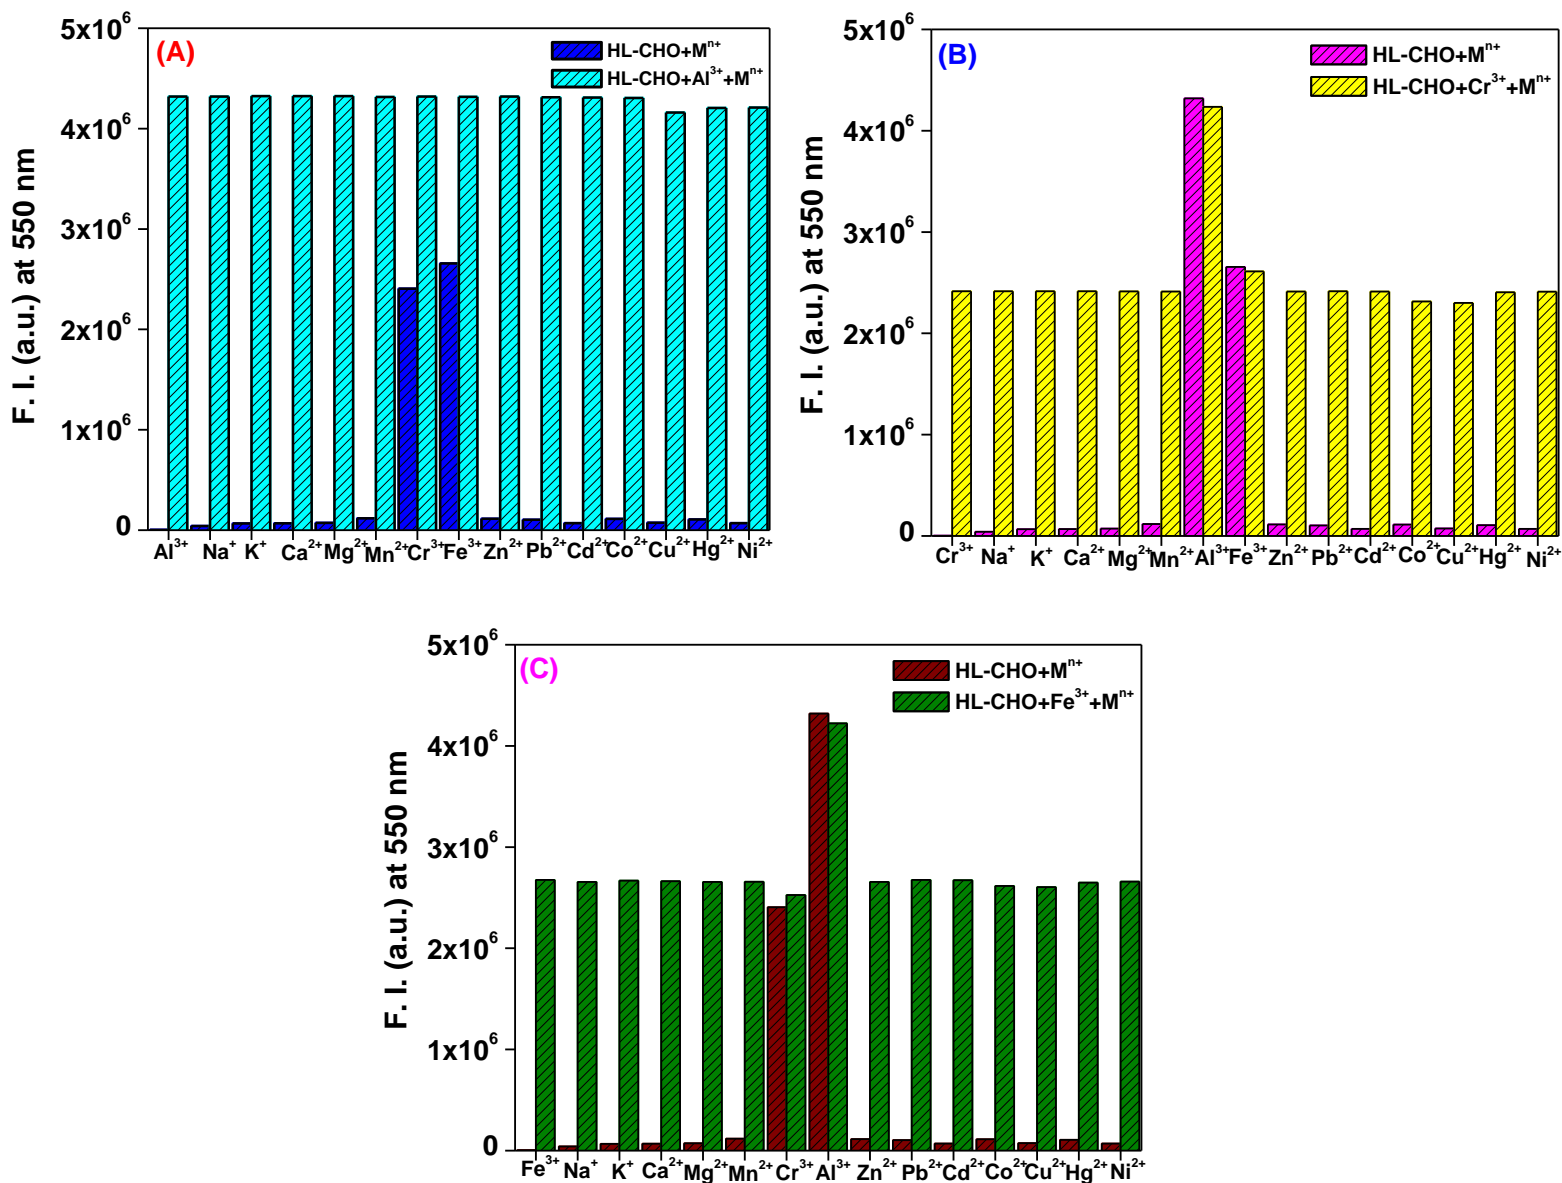

**Fig. s5** Fluorescence intensity of HL-CHO with (A)  $\text{Al}^{3+}$ , (B)  $\text{Cr}^{3+}$  and (C)  $\text{Fe}^{3+}$  ions in the presence of five equivalent of other metal ions in 10 mM HEPES buffer.4 in  $\text{H}_2\text{O}$ :methanol (1:9, v/v) (pH 7) at room temperature.

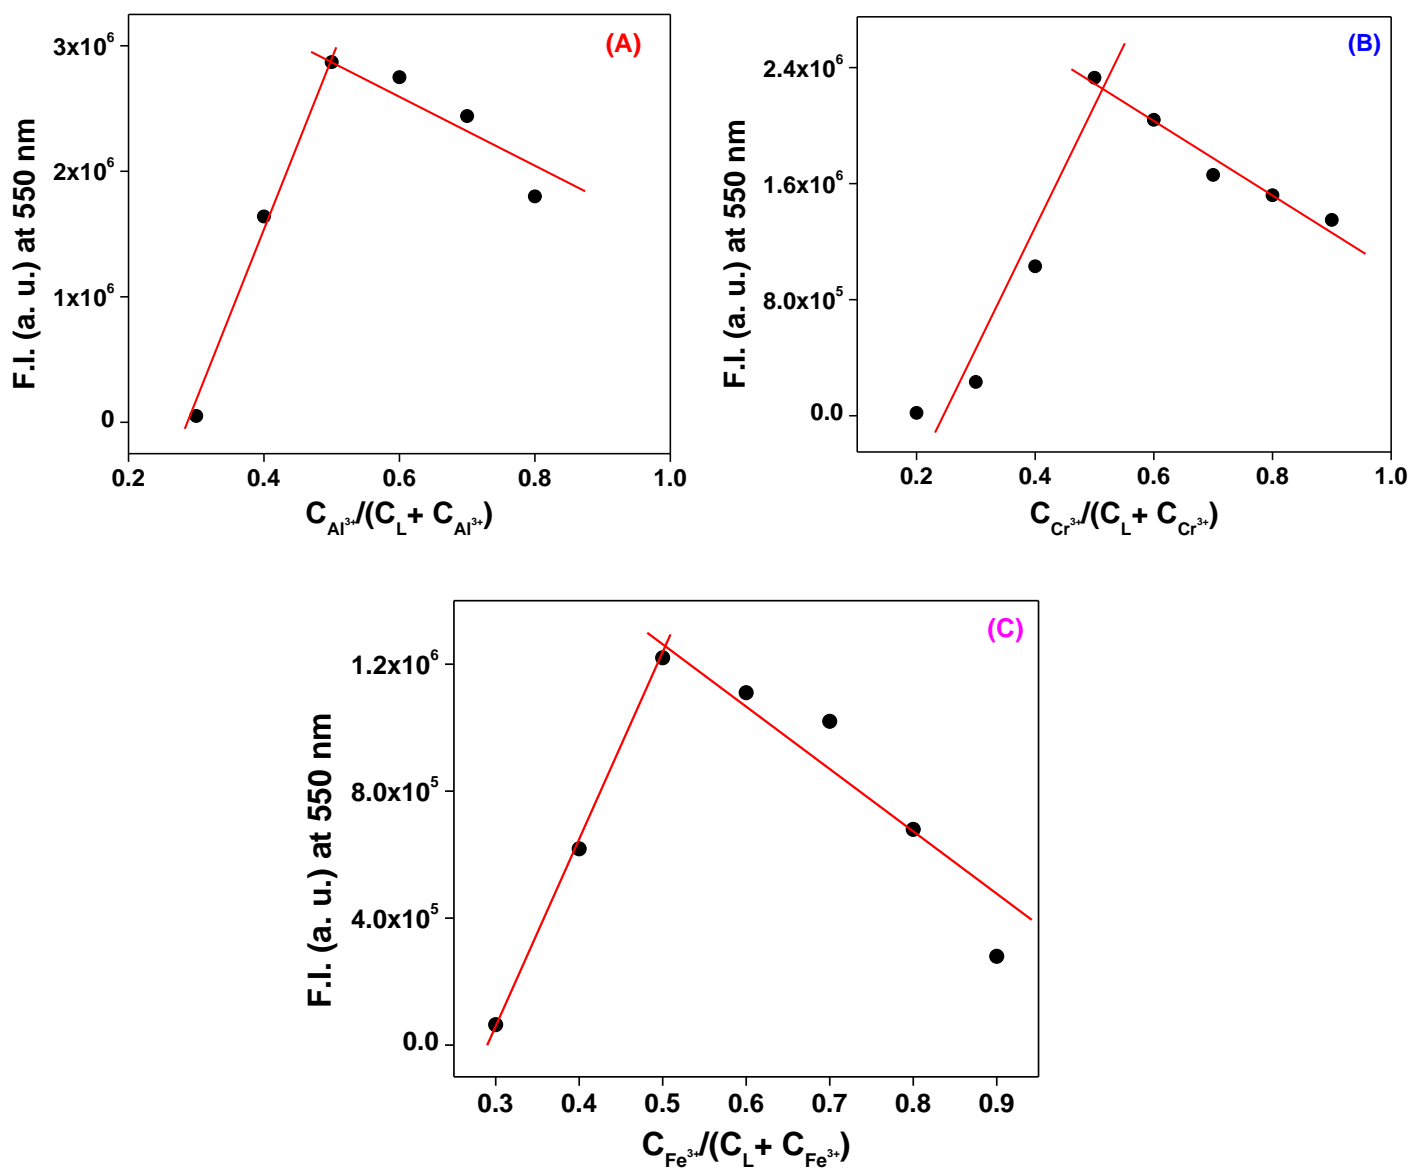

**Fig. s6** Job's plot analysis with (A)  $\text{Al}^{3+}$ , (B)  $\text{Cr}^{3+}$  and (C)  $\text{Fe}^{3+}$  ions. Analysis shows 1:1 binding with HL-CHO. Here, L denotes HL-CHO.

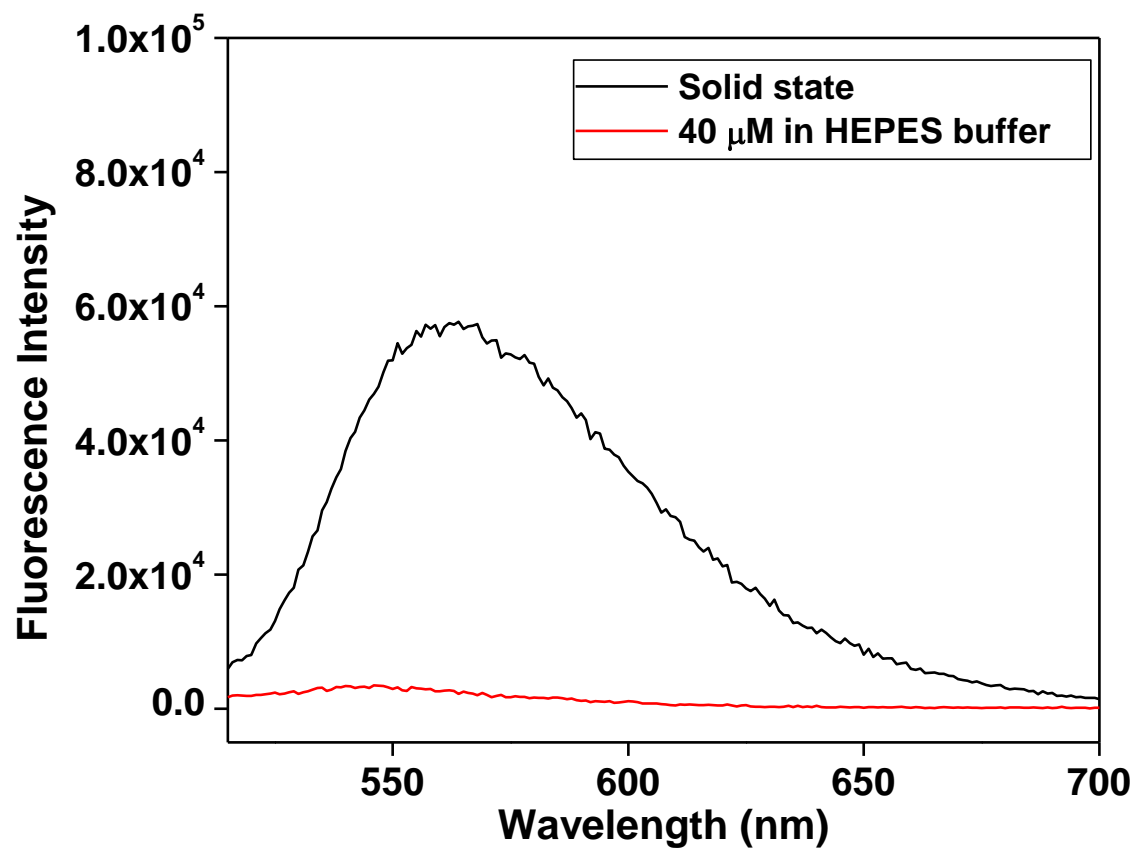

**Fig. s7** Fluorescence spectrum of HL-CHO in solid state and in solution (HEPES buffer)



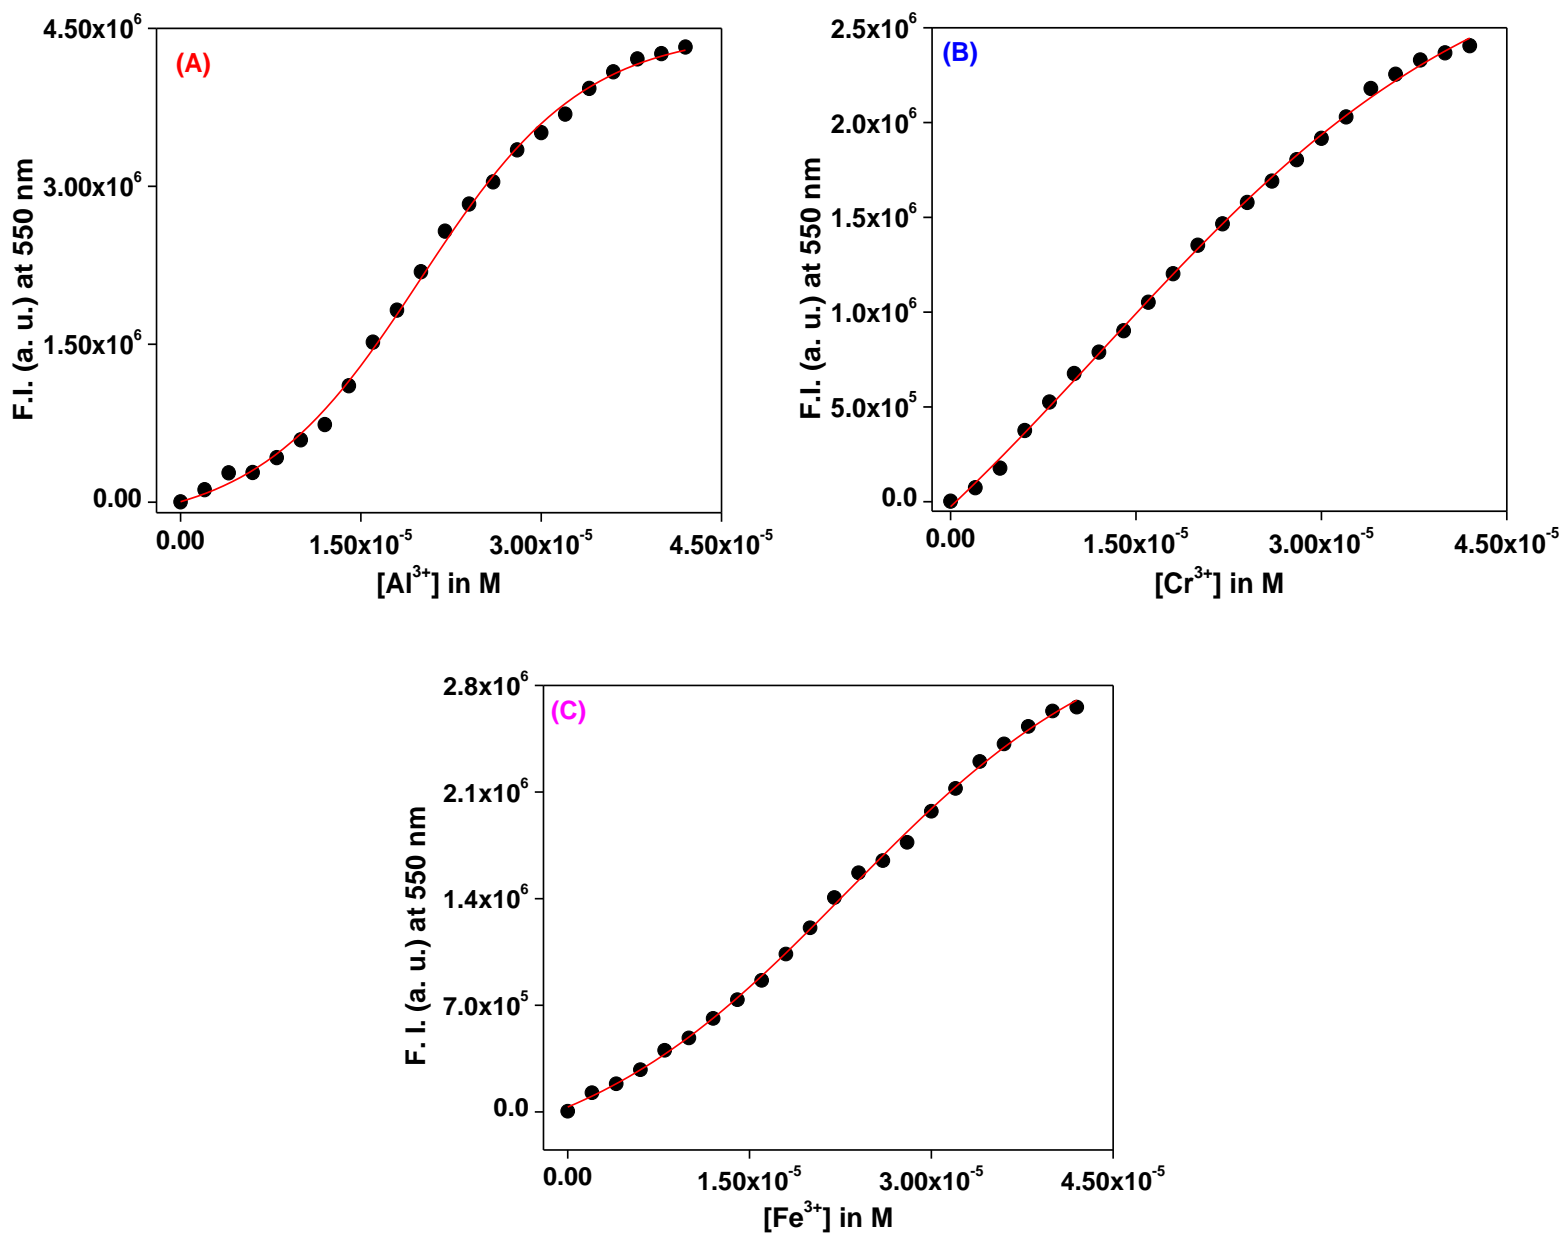

**Fig. s8** Non-linear plot of fluorescence intensity (at 550 nm) vs. (A)  $[\text{Al}^{3+}]$ , (B)  $[\text{Cr}^{3+}]$  and (C)  $[\text{Fe}^{3+}]$

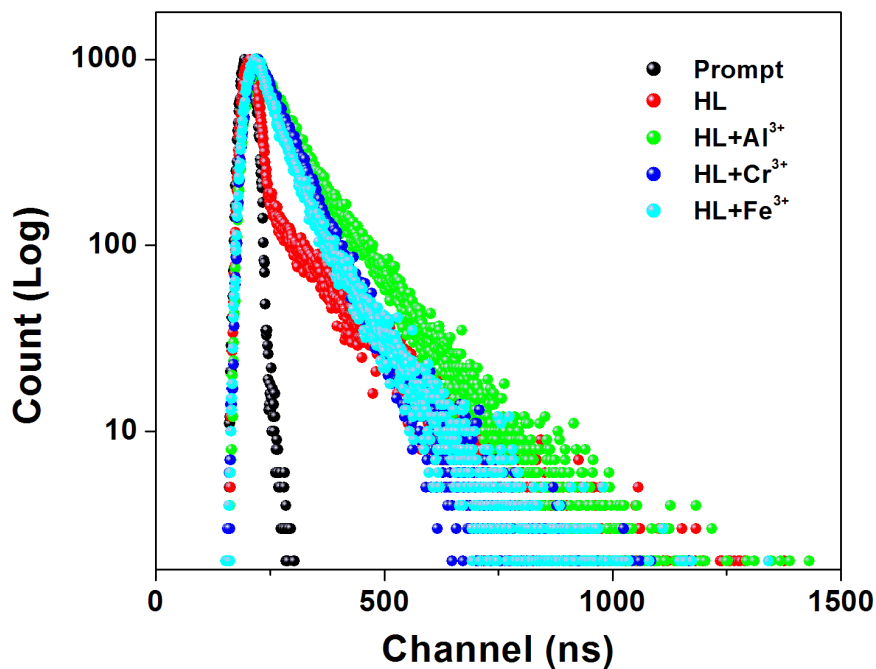

**Fig. s9** Excited state fluorescence decay behavior of HL-CHO and its complex with  $\text{Al}^{3+}$ ,  $\text{Cr}^{3+}$  and  $\text{Fe}^{3+}$  ions in 10 mM HEPES buffer.4 in  $\text{H}_2\text{O}$ :methanol (1:9, v/v) (pH 7) at room temperature. Here, HL denotes HL-CHO.

#### Determination of LOD of HL:

Limit of detection (LOD) for our probe has been determined by  $3\sigma$  method by the following equation:  $DL = K \cdot Sb1/S$

where  $K = 2$  or  $3$  ( $3$  in this case); here  $Sb1$  is the standard deviation of the blank HL-CHO solution; and  $S$  is the slope of the calibration curve obtained from Linear dynamic plot of F.I. vs  $[\text{M}^{3+}]$  in M. From the calculated high LOD values, it can be concluded that HL is a very good sensor for all the cations.

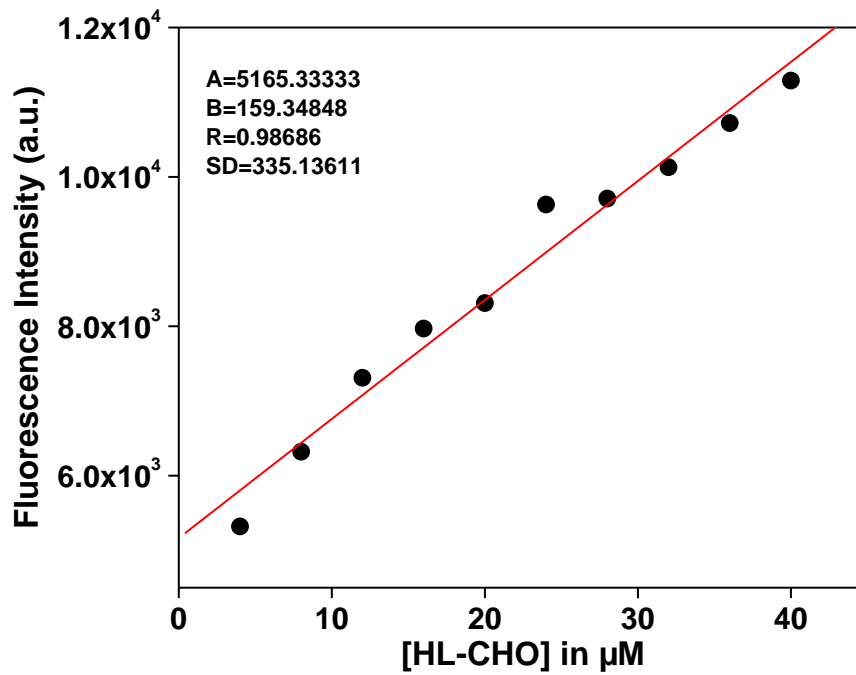

**Fig. s10** Determination of Sb1 of the blank, HL-CHO solution.

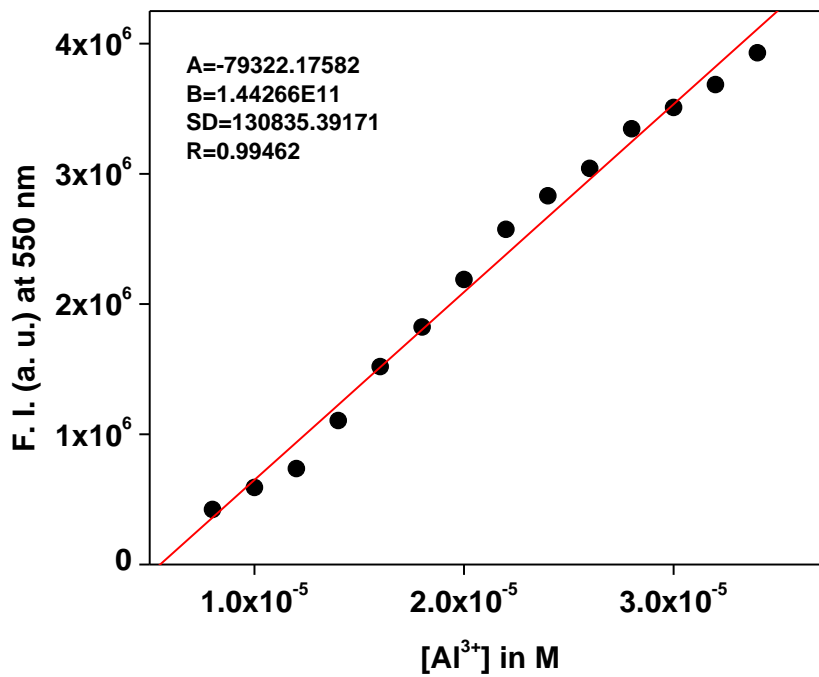

**Fig. s11** Linear dynamic plot of F.I. (at 550 nm) vs. [Al<sup>3+</sup>] for the determination of S (slope)

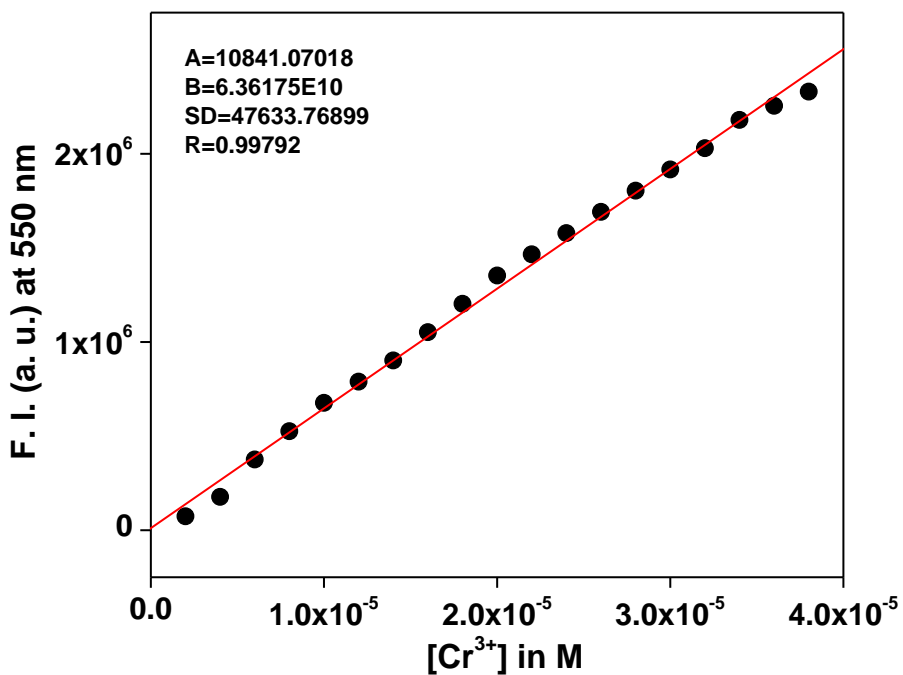

**Fig. s12** Linear dynamic plot of F.I. (at 550 nm) vs.  $[\text{Cr}^{3+}]$  for the determination of S (slope)

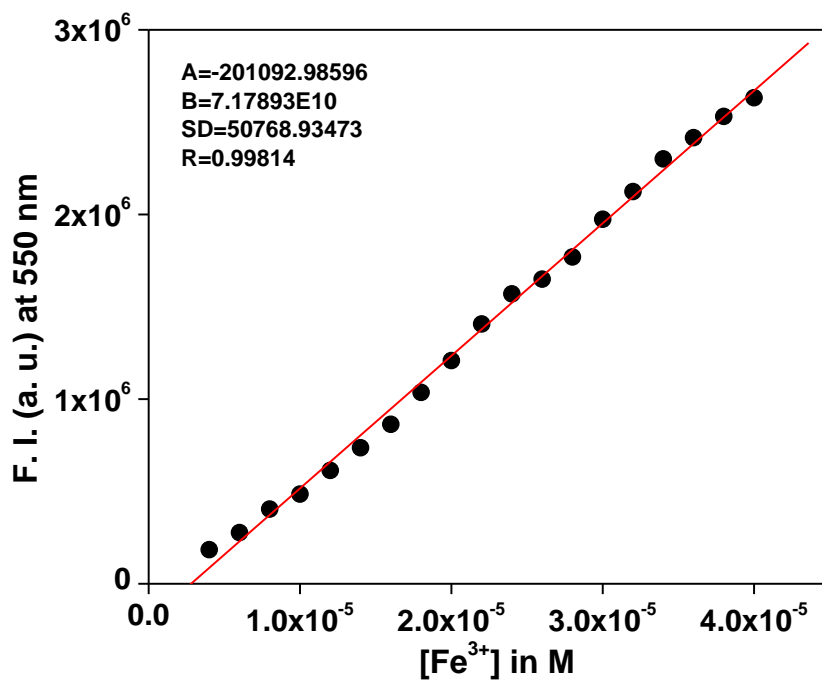

**Fig. s13** Linear dynamic plot of F.I. (at 550 nm) vs.  $[\text{Fe}^{3+}]$  for the determination of S (slope)

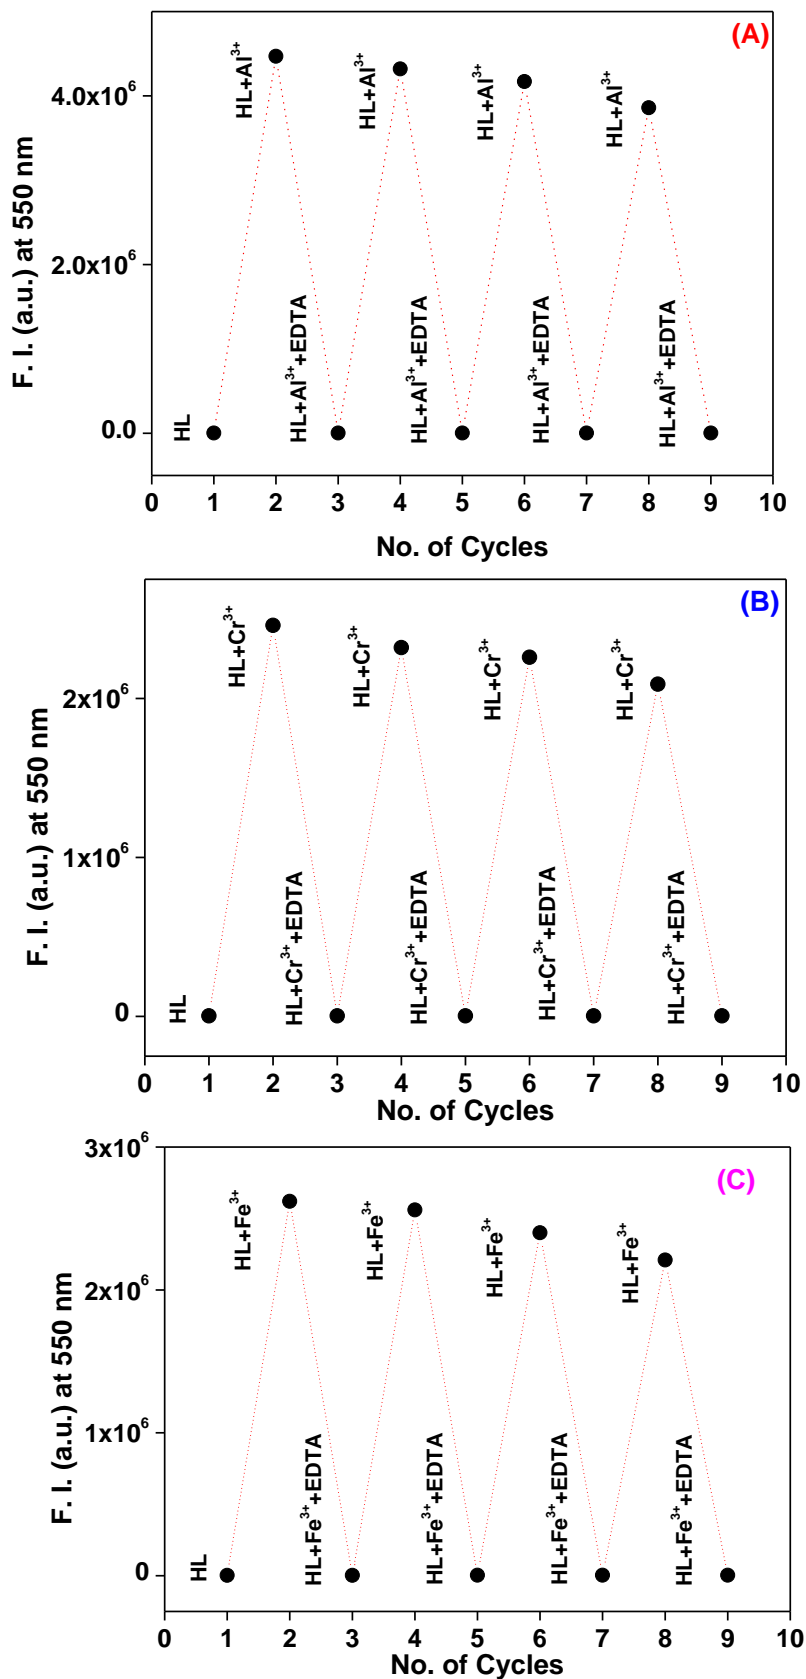

**Fig. s14** Fluorescence intensities of HL-CHO + M<sup>3+</sup> (1 : 1) in the presence of Na<sub>2</sub>-EDTA for several cycles. Fluorescence spectra monitored at 550 nm. Here, HL denotes HL-CHO.

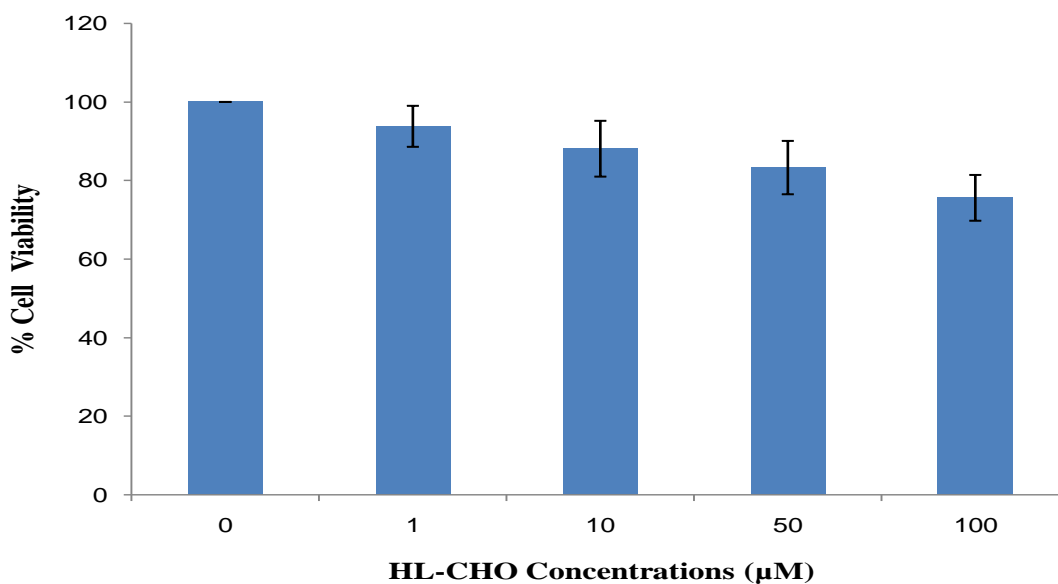

**Fig. S15** % cell viability of human neuroblastoma SH-SY5Y cells incubated with different concentrations (1 µM-100 µM) of HL-CHO for 12 h as determined by MTT assay. Results are expressed as mean ± S.E of three independent experiments.

**Table S1** Elemental analysis of HL-CHO and its complexes with Al<sup>3+</sup>, Cr<sup>3+</sup> and Fe<sup>3+</sup>

| Species                                                            | Type       | C     | H    | N     |
|--------------------------------------------------------------------|------------|-------|------|-------|
| HL-CHO                                                             | Calculated | 73.73 | 6.35 | 9.30  |
| (C <sub>37</sub> H <sub>38</sub> N <sub>4</sub> O <sub>4</sub> )   | Found      | 73.65 | 6.26 | 9.23  |
| HL-CHO + Al <sup>3+</sup>                                          | Calculated | 64.53 | 5.12 | 10.17 |
| ([Al(L')NO <sub>3</sub> ])                                         | Found      | 64.42 | 4.93 | 10.12 |
| (C <sub>37</sub> H <sub>35</sub> AlN <sub>5</sub> O <sub>7</sub> ) | Found      | 64.42 | 4.93 | 10.12 |
| HL-CHO + Cr <sup>3+</sup>                                          | Calculated | 60.73 | 5.10 | 9.57  |
| ([Cr(L')(H <sub>2</sub> O)]NO <sub>3</sub> )                       | Found      | 60.66 | 5.02 | 9.45  |
| (C <sub>37</sub> H <sub>37</sub> CrN <sub>5</sub> O <sub>8</sub> ) | Found      | 60.66 | 5.02 | 9.45  |
| HL-CHO + Fe <sup>3+</sup>                                          | Calculated | 60.42 | 5.07 | 9.52  |
| ([Fe(L')(H <sub>2</sub> O)]NO <sub>3</sub> )                       | Found      | 60.30 | 4.98 | 9.40  |
| (C <sub>37</sub> H <sub>37</sub> FeN <sub>5</sub> O <sub>8</sub> ) | Found      | 60.30 | 4.98 | 9.40  |

**Table S2** Comparison of a few aspects of some recently published related rhodamine based chemosensors

| Entry | Probe                                                                               | Excitation (nm)/ Emission (nm)                                                  | Fluorescence Enhancement (fold)                                                  | Concerned Cations                                      | LOD                                                                                                                             | Binding Constant ( $K_a$ ) or Dissociation Constant ( $K_d$ )                                                                                                                                                     | Cell Imaging | Ref. |
|-------|-------------------------------------------------------------------------------------|---------------------------------------------------------------------------------|----------------------------------------------------------------------------------|--------------------------------------------------------|---------------------------------------------------------------------------------------------------------------------------------|-------------------------------------------------------------------------------------------------------------------------------------------------------------------------------------------------------------------|--------------|------|
| 1.    | 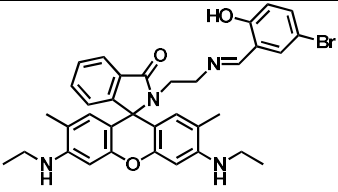   | 500/552                                                                         | 98 ( $\text{Al}^{3+}$ )<br>50 ( $\text{Cr}^{3+}$ )<br>38 ( $\text{Fe}^{3+}$ )    | $\text{Al}^{3+}$ , $\text{Cr}^{3+}$ , $\text{Fe}^{3+}$ | 1.18 nM ( $\text{Al}^{3+}$ ),<br>1.80 nM ( $\text{Cr}^{3+}$ ),<br>4.04 nM ( $\text{Fe}^{3+}$ )                                  | $K_d = 5.20 \pm 0.39 \mu\text{M}$ ( $\text{Al}^{3+}$ )<br>$= 4.07 \pm 0.13 \mu\text{M}$ ( $\text{Fe}^{3+}$ )<br>$= 6.49 \pm 0.21 \mu\text{M}$ ( $\text{Cr}^{3+}$ )                                                | No           | 22   |
| 2.    |    | 502/558                                                                         | 31 ( $\text{Al}^{3+}$ )<br>26 ( $\text{Cr}^{3+}$ )<br>41 ( $\text{Fe}^{3+}$ )    | $\text{Al}^{3+}$ , $\text{Cr}^{3+}$ , $\text{Fe}^{3+}$ | 1.34 $\mu\text{M}$ ( $\text{Al}^{3+}$ ),<br>2.28 $\mu\text{M}$ ( $\text{Cr}^{3+}$ ),<br>1.28 $\mu\text{M}$ ( $\text{Fe}^{3+}$ ) | $K_a = (1.34 \pm 0.1) \times 10^4 \text{M}^{-1}$ ( $\text{Al}^{3+}$ )<br>$= (0.94 \pm 0.01) \times 10^4 \text{M}^{-1}$ ( $\text{Fe}^{3+}$ )<br>$= (0.87 \pm 0.01) \times 10^4 \text{M}^{-1}$ ( $\text{Cr}^{3+}$ ) | Yes          | 15c  |
| 3.    |    | 330/582 ( $\text{Al}^{3+}$ )<br>330/376 ( $\text{Cr}^{3+}$ , $\text{Fe}^{3+}$ ) | 62 ( $\text{Al}^{3+}$ )<br>1.7 ( $\text{Cr}^{3+}$ )<br>1.47 ( $\text{Fe}^{3+}$ ) | $\text{Al}^{3+}$ , $\text{Cr}^{3+}$ , $\text{Fe}^{3+}$ | 1.74 nM ( $\text{Al}^{3+}$ ),<br>2.36 $\mu\text{M}$ ( $\text{Cr}^{3+}$ ),<br>2.90 $\mu\text{M}$ ( $\text{Fe}^{3+}$ )            | $K_a = 1 \times 10^4 \text{M}^{-1}$ ( $\text{Al}^{3+}$ )<br>$= 1.2 \times 10^2 \text{M}^{-1}$ ( $\text{Fe}^{3+}$ )<br>$= 2.6 \times 10^2 \text{M}^{-1}$ ( $\text{Cr}^{3+}$ )                                      | No           | 15a  |
| 4.    |   | 500/552                                                                         | 630                                                                              | $\text{Al}^{3+}$                                       | 2.8 nM                                                                                                                          | $K_d = 4.88 (\pm 0.18) \mu\text{M}$                                                                                                                                                                               | Yes          | 23   |
| 5.    |  | 500/550 ( $\text{Al}^{3+}$ )<br>370/454 ( $\text{Zn}^{2+}$ )                    | 650 ( $\text{Al}^{3+}$ )<br>7 ( $\text{Zn}^{2+}$ )                               | $\text{Al}^{3+}$ , $\text{Zn}^{2+}$                    | 10.98 nM ( $\text{Al}^{3+}$ )<br>76.92 nM ( $\text{Zn}^{2+}$ )                                                                  | $K_a = 9.38 \times 10^3 \text{M}^{-1}$ ( $\text{Al}^{3+}$ )<br>$= 4.75 \times 10^4 \text{M}^{-1}$ ( $\text{Zn}^{2+}$ )                                                                                            | Yes          | 24   |

|     |                                                                                     |         |       |                  |       |       |     |     |
|-----|-------------------------------------------------------------------------------------|---------|-------|------------------|-------|-------|-----|-----|
| 6.  | 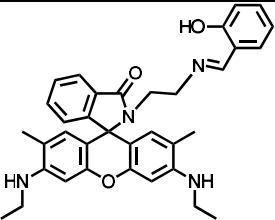   | 528/552 | ----- | $\text{Fe}^{3+}$ | ----- | ----- | Yes | 19b |
| 7.  |    | 528/552 | ----- | $\text{Fe}^{3+}$ | ----- | ----- | Yes | 19b |
| 8.  |    | 528/552 | ----- | $\text{Fe}^{3+}$ | ----- | ----- | Yes | 19b |
| 9.  |   | 528/552 | ----- | $\text{Fe}^{3+}$ | ----- | ----- | Yes | 19b |
| 10. |  | 528/552 | ----- | $\text{Fe}^{3+}$ | ----- | ----- | Yes | 19b |



|     |                                                                                     |         |                                                                               |                                                        |                                                                                                                                 |                                                                                                                                                                                   |     |     |
|-----|-------------------------------------------------------------------------------------|---------|-------------------------------------------------------------------------------|--------------------------------------------------------|---------------------------------------------------------------------------------------------------------------------------------|-----------------------------------------------------------------------------------------------------------------------------------------------------------------------------------|-----|-----|
| 11. | 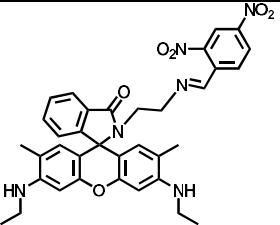   | 528/552 | -----                                                                         | $\text{Fe}^{3+}$                                       | -----                                                                                                                           | -----                                                                                                                                                                             | Yes | 19b |
| 12. |    | 510/555 | 14 ( $\text{Al}^{3+}$ )<br>10 ( $\text{Cr}^{3+}$ )<br>21 ( $\text{Fe}^{3+}$ ) | $\text{Al}^{3+}$ , $\text{Cr}^{3+}$ , $\text{Fe}^{3+}$ | 0.34 $\mu\text{M}$ ( $\text{Al}^{3+}$ ),<br>0.31 $\mu\text{M}$ ( $\text{Cr}^{3+}$ ),<br>0.29 $\mu\text{M}$ ( $\text{Fe}^{3+}$ ) | $K_a = 8.2 \times 10^4 \text{ M}^{-1}$ ( $\text{Al}^{3+}$ )<br>$= 6.7 \times 10^4 \text{ M}^{-1}$ ( $\text{Fe}^{3+}$ )<br>$= 6.0 \times 10^4 \text{ M}^{-1}$ ( $\text{Cr}^{3+}$ ) | Yes | 15b |
| 13. |    | 525/556 | 18                                                                            | $\text{Fe}^{3+}$                                       | 0.030 $\mu\text{M}$                                                                                                             | -----                                                                                                                                                                             | Yes | 32a |
| 14. |   | 500/556 | -----                                                                         | $\text{Hg}^{2+}$                                       | 0.5-10 $\mu\text{M}$                                                                                                            | $3.5 \times 10^6$ (Stability Constant)                                                                                                                                            | No  | 21  |
| 15. |  | 525/581 | -----                                                                         | $\text{Hg}^{2+}$                                       | $2.5 \times 10^{-8} \text{ M}$                                                                                                  | $K_a = 2.1 \times 10^7 \text{ M}^{-1}$                                                                                                                                            | Yes | 32b |

|     |                                                                                     |         |                                                 |                                                                           |                                                                                                |                                                                                                                                             |     |     |
|-----|-------------------------------------------------------------------------------------|---------|-------------------------------------------------|---------------------------------------------------------------------------|------------------------------------------------------------------------------------------------|---------------------------------------------------------------------------------------------------------------------------------------------|-----|-----|
| 16. | 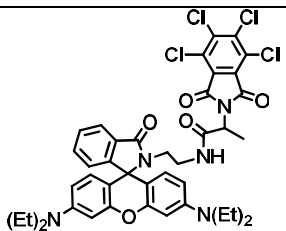   | 525/581 | -----                                           | Hg <sup>2+</sup>                                                          | 4.2 × 10 <sup>-8</sup> M                                                                       | K <sub>a</sub> = 4.4 × 10 <sup>5</sup> M <sup>-1</sup>                                                                                      | Yes | 32b |
| 17. |    | 525/581 | -----                                           | Al <sup>3+</sup>                                                          | 2.9 × 10 <sup>-8</sup> M                                                                       | K <sub>a</sub> = 3.9 × 10 <sup>5</sup> M <sup>-1</sup>                                                                                      | Yes | 32b |
| 18. |    | 554/583 | -----                                           | Al <sup>3+</sup> , Hg <sup>2+</sup>                                       | 1.4 × 10 <sup>-7</sup> M (Hg <sup>2+</sup> )<br>1.1 × 10 <sup>-8</sup> M (Al <sup>3+</sup> )   | K <sub>a</sub> = 7.0 × 10 <sup>3</sup> M <sup>-1</sup> (Hg <sup>2+</sup> )<br>= 4.5 × 10 <sup>4</sup> M <sup>-1</sup> (Al <sup>3+</sup> )   | No  | 32c |
| 19. |   | 554/583 | -----                                           | Al <sup>3+</sup> , Hg <sup>2+</sup>                                       | 1.89 × 10 <sup>-8</sup> M (Hg <sup>2+</sup> )<br>1.64 × 10 <sup>-7</sup> M (Al <sup>3+</sup> ) | K <sub>a</sub> = 1.49 × 10 <sup>10</sup> M <sup>-2</sup> (Hg <sup>2+</sup> )<br>= 8.0 × 10 <sup>9</sup> M <sup>-2</sup> (Al <sup>3+</sup> ) | No  | 32c |
| 20. |  | 520/570 | 13 (Fe <sup>3+</sup> )<br>3 (Cu <sup>2+</sup> ) | Cu <sup>2+</sup><br>(Colorimetric),<br>Fe <sup>3+</sup><br>(Fluorimetric) | 69 μM (Cu <sup>2+</sup> )<br>100 μM (Fe <sup>3+</sup> )                                        | K <sub>a</sub> = 1.65 × 10 <sup>3</sup> M <sup>-1</sup> (Cu <sup>2+</sup> )<br>= 9.75 × 10 <sup>2</sup> M <sup>-1</sup> (Fe <sup>3+</sup> ) | No  | 32d |
| 21. |  | 570/593 | -----                                           | Cu <sup>2+</sup><br>(Colorimetric),<br>Fe <sup>3+</sup><br>(Fluorimetric) | 48 nM (Cu <sup>2+</sup> )<br>3.9 nM (Fe <sup>3+</sup> )                                        | K <sub>a</sub> = 5.80 × 10 <sup>4</sup> M <sup>-1</sup> (Cu <sup>2+</sup> )<br>= 6.50 × 10 <sup>4</sup> M <sup>-1</sup> (Fe <sup>3+</sup> ) | No  | 32e |

|     |                                                                                           |                                                                  |                                                  |                                                                           |                                                                                                       |                                                                                                                    |     |     |
|-----|-------------------------------------------------------------------------------------------|------------------------------------------------------------------|--------------------------------------------------|---------------------------------------------------------------------------|-------------------------------------------------------------------------------------------------------|--------------------------------------------------------------------------------------------------------------------|-----|-----|
| 22. | 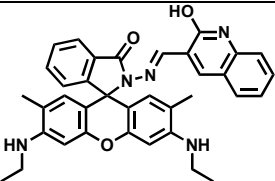         | 510/572                                                          | -----                                            | Cu <sup>2+</sup><br>(Colorimetric),<br>Fe <sup>3+</sup><br>(Fluorimetric) | 18 nM<br>(Cu <sup>2+</sup> )<br>33 nM<br>(Fe <sup>3+</sup> )                                          | $K_d = 13.99 \times 10^{-2} \text{ M (Cu}^{2+})$<br>$= 1.3 \times 10^{-2} \text{ M (Fe}^{3+})$                     | Yes | 32f |
| 23. |          | 560/578                                                          | 90 (Fe <sup>3+</sup> )                           | Cu <sup>2+</sup><br>(Colorimetric),<br>Fe <sup>3+</sup><br>(Fluorimetric) | -----                                                                                                 | -----                                                                                                              | No  | 32g |
| 24. |          | 550/582                                                          | -----                                            | Cu <sup>2+</sup><br>(Colorimetric),<br>Fe <sup>3+</sup><br>(Fluorimetric) | 38 nM<br>(Cu <sup>2+</sup> )<br>92 nM<br>(Fe <sup>3+</sup> )                                          | $K_a = 7.1 \times 10^5 \text{ M}^{-1} \text{ (Cu}^{2+})$<br>$= 7.4 \times 10^4 \text{ M}^{-1} \text{ (Fe}^{3+})$   | No  | 32h |
| 25. |          | 530/582                                                          | 1098 (Fe <sup>3+</sup> )                         | Cu <sup>2+</sup><br>(Colorimetric),<br>Fe <sup>3+</sup><br>(Fluorimetric) | $6.82 \times 10^{-2}$<br>$\mu\text{mol/L}$<br>(Cu <sup>2+</sup> )<br>17 nmol/L<br>(Fe <sup>3+</sup> ) | $K_a = 7.1 \times 10^5 \text{ M}^{-1} \text{ (Cu}^{2+})$<br>$= 7.4 \times 10^4 \text{ M}^{-1} \text{ (Fe}^{3+})$   | No  | 32i |
| 26. | <br>x=9 | 515/572<br>(Cu <sup>2+</sup> )<br>515/580<br>(Fe <sup>3+</sup> ) | 20 (Cu <sup>2+</sup> )<br>14 (Fe <sup>3+</sup> ) | Cu <sup>2+</sup> , Fe <sup>3+</sup>                                       | -----                                                                                                 | -----                                                                                                              | No  | 32j |
| 27. |        | 500/573<br>(Cu <sup>2+</sup> )<br>500/575<br>(Fe <sup>3+</sup> ) | -----                                            | Cu <sup>2+</sup> , Fe <sup>3+</sup>                                       | 10 nM<br>(Cu <sup>2+</sup> )<br>164 nM<br>(Fe <sup>3+</sup> )                                         | $K_a = 4.22 \times 10^5 \text{ M}^{-1} \text{ (Cu}^{2+})$<br>$= 2.94 \times 10^3 \text{ M}^{-1} \text{ (Fe}^{3+})$ | No  | 32j |

|     |                                                                                     |         |                         |                                                                           |                                                                                                                  |                                                                                                                  |     |     |
|-----|-------------------------------------------------------------------------------------|---------|-------------------------|---------------------------------------------------------------------------|------------------------------------------------------------------------------------------------------------------|------------------------------------------------------------------------------------------------------------------|-----|-----|
| 28. | 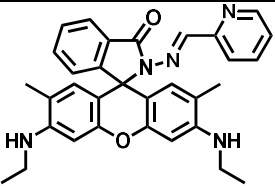   | 500/552 | -----                   | Cu <sup>2+</sup><br>(Colorimetric),<br>Fe <sup>3+</sup><br>(Fluorimetric) | 250 nM<br>(Cu <sup>2+</sup> )<br>90 nM<br>(Fe <sup>3+</sup> )                                                    | $K_a = 1.9 \times 10^4 \text{ M}^{-1} (\text{Cu}^{2+})$<br>$= 1.5 \times 10^5 \text{ M}^{-1} (\text{Fe}^{3+})$   | No  | 32l |
| 29. |    | 521/586 | -----                   | Cu <sup>2+</sup><br>(Colorimetric),<br>Hg <sup>2+</sup><br>(Fluorimetric) | $5.92 \times 10^{-7} \text{ M}$<br>(Cu <sup>2+</sup> )<br>$2.85 \times 10^{-6} \text{ M}$<br>(Hg <sup>2+</sup> ) | $K_a = 5.38 \times 10^4 \text{ M}^{-1} (\text{Cu}^{2+})$<br>$= 1.63 \times 10^5 \text{ M}^{-1} (\text{Hg}^{2+})$ | No  | 32m |
| 30. |    | 550/580 | -----                   | Fe <sup>3+</sup>                                                          | 5 μM                                                                                                             | $K_a = 4.52 \times 10^5 \text{ M}^{-1}$                                                                          | Yes | 32n |
| 31. |    | 500/554 | 90                      | Hg <sup>2+</sup>                                                          | In ppb level                                                                                                     | $K_a = 8.0 \times 10^5 \pm 0.1 \text{ M}^{-2}$                                                                   | Yes | 32o |
| 32. |   | 530/586 | 100 (Hg <sup>2+</sup> ) | Cu <sup>2+</sup><br>(Colorimetric),<br>Hg <sup>2+</sup><br>(Fluorimetric) | 3.37 μM<br>(Cu <sup>2+</sup> )<br>150 nM<br>(Hg <sup>2+</sup> )                                                  | $K_a = 2.2 \times 10^3 \text{ M}^{-1} (\text{Cu}^{2+})$<br>$= 1.3 \times 10^4 \text{ M}^{-1} (\text{Hg}^{2+})$   | No  | 32p |
| 33. |  | 552/582 | 80 (Hg <sup>2+</sup> )  | Cu <sup>2+</sup><br>(Colorimetric),<br>Hg <sup>2+</sup><br>(Fluorimetric) | -----                                                                                                            | -----                                                                                                            | No  | 32q |

|     |                                                                                     |         |                         |                                                                           |                                                                  |                                                                                                                                             |     |     |
|-----|-------------------------------------------------------------------------------------|---------|-------------------------|---------------------------------------------------------------------------|------------------------------------------------------------------|---------------------------------------------------------------------------------------------------------------------------------------------|-----|-----|
| 34. | 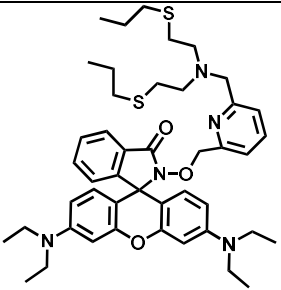   | 450/582 | 259 (Hg <sup>2+</sup> ) | Cu <sup>2+</sup><br>(Colorimetric),<br>Hg <sup>2+</sup><br>(Fluorimetric) | 1.63 μM<br>(Cu <sup>2+</sup> )<br>2.36 μM<br>(Hg <sup>2+</sup> ) | K <sub>a</sub> = 1.61 × 10 <sup>5</sup> M <sup>-1</sup> (Cu <sup>2+</sup> )<br>= 3.28 × 10 <sup>5</sup> M <sup>-1</sup> (Hg <sup>2+</sup> ) | Yes | 32r |
| 35. |    | 520/580 | 132                     | Cu <sup>2+</sup>                                                          | 1 nM                                                             | K <sub>a</sub> = 1.36 × 10 <sup>5</sup> M <sup>-1</sup>                                                                                     | Yes | 32s |
| 36. |    | 520/582 | -----                   | Hg <sup>2+</sup>                                                          | 0.11 μM                                                          | K <sub>a</sub> = 3.03 × 10 <sup>4</sup> M <sup>-1</sup>                                                                                     | Yes | 32t |
| 37. |   | 500/545 | 27                      | Hg <sup>2+</sup>                                                          | 26.3 nM                                                          | K <sub>a</sub> = 3.39 × 10 <sup>4</sup> M <sup>-1</sup>                                                                                     | Yes | 32u |
| 38. |  | 520/580 | 100                     | Cr <sup>3+</sup>                                                          | 7.5 nM                                                           | K <sub>a</sub> = 3.4 × 10 <sup>4</sup> M <sup>-1</sup>                                                                                      | Yes | 4a  |
| 39. |  | 560/582 | 100                     | Fe <sup>3+</sup>                                                          | 0.067 μM                                                         | K <sub>a</sub> = 2.70 × 10 <sup>4</sup> M <sup>-1</sup>                                                                                     | Yes | 32v |
| 40. |  | 560/582 | 100                     | Fe <sup>3+</sup>                                                          | 0.345 μM                                                         | K <sub>a</sub> = 1.97 × 10 <sup>4</sup> M <sup>-1</sup>                                                                                     | Yes | 32v |

|     |                                                                                     |         |                                                                                   |                                                        |                                                                                                  |                                                                                                                                                                                      |     |               |
|-----|-------------------------------------------------------------------------------------|---------|-----------------------------------------------------------------------------------|--------------------------------------------------------|--------------------------------------------------------------------------------------------------|--------------------------------------------------------------------------------------------------------------------------------------------------------------------------------------|-----|---------------|
| 41. | 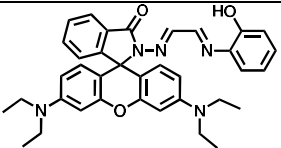   | 540/578 | -----                                                                             | $\text{Al}^{3+}$                                       | 0.16 $\mu\text{M}$                                                                               | $K_a = 6.9 \times 10^4 \text{ M}^{-1}$                                                                                                                                               | Yes | 3e            |
| 42. |    | 530/561 | -----                                                                             | $\text{Fe}^{3+}$                                       | 0.29 $\mu\text{M}$                                                                               | $K_a = 1.4 \times 10^{10} \text{ M}^{-2}$                                                                                                                                            | No  | 32w           |
| 43. |    | 525/586 | 75                                                                                | $\text{Hg}^{2+}$                                       | 2.1 nM                                                                                           | $K_a = 1.05 \times 10^5 \text{ M}^{-1}$                                                                                                                                              | Yes | 32x           |
| 44. |   | 510/556 | -----                                                                             | $\text{Fe}^{3+}$                                       | 0.29 $\mu\text{M}$                                                                               | $K_a = 1.17(\pm 0.50) \times 10^4 \text{ M}^{-1}$                                                                                                                                    | No  | 32y           |
| 45  |  | 500/550 | 1465 ( $\text{Al}^{3+}$ )<br>588 ( $\text{Cr}^{3+}$ )<br>800 ( $\text{Fe}^{3+}$ ) | $\text{Al}^{3+}$ , $\text{Cr}^{3+}$ , $\text{Fe}^{3+}$ | 6.97 nM ( $\text{Al}^{3+}$ ),<br>15.80 nM ( $\text{Cr}^{3+}$ ),<br>14.00 nM ( $\text{Fe}^{3+}$ ) | $K_a = 1.47 \times 10^5 \text{ M}^{-1}$ ( $\text{Al}^{3+}$ )<br>$= 6.24 \times 10^4 \text{ M}^{-1}$ ( $\text{Cr}^{3+}$ )<br>$= 8.74 \times 10^4 \text{ M}^{-1}$ ( $\text{Fe}^{3+}$ ) | Yes | Present study |
